# Supplementary material for: Identification of Non-Electrophilic Nrf2 Activators from Approved Drugs
Source: MDPI journal article supplement (doi:10.3390/molecules22060883), 2017-05-26

This file contains a part of concentration data and gel electrophoresis results of our RNA samples. Because the experiments were done in different batches, the information of earlier samples has been delated. We think that these data can prove the quantities and quality of our RNA samples.

| No. | Sample Name | Concentration<br>( $\mu\text{g}/\mu\text{L}$ ) | Vol.<br>( $\mu\text{L}$ ) | A260/ A280 | Result    |
|-----|-------------|------------------------------------------------|---------------------------|------------|-----------|
| 1   | DMSO 0-1    | 0.274                                          | 20                        | 2.12       | Qualified |
| 2   | DMSO 0-2    | 0.299                                          | 20                        | 2.15       | Qualified |
| 3   | DMSO 0-3    | 0.280                                          | 20                        | 2.14       | Qualified |
| 4   | DMSO 6-1    | 0.325                                          | 20                        | 2.13       | Qualified |
| 5   | DMSO 6-2    | 0.318                                          | 20                        | 2.12       | Qualified |
| 6   | DMSO 6-3    | 0.325                                          | 20                        | 2.15       | Qualified |
| 7   | DMSO 12-1   | 0.355                                          | 20                        | 2.15       | Qualified |
| 8   | DMSO 12-2   | 0.344                                          | 20                        | 2.10       | Qualified |
| 9   | DMSO 12-3   | 0.330                                          | 20                        | 2.14       | Qualified |
| 10  | DMSO 24-1   | 0.412                                          | 20                        | 2.13       | Qualified |
| 11  | DMSO 24-2   | 0.419                                          | 20                        | 2.14       | Qualified |
| 12  | DMSO 24-3   | 0.402                                          | 20                        | 2.14       | Qualified |
| 13  | Ast6-1      | 0.304                                          | 20                        | 2.14       | Qualified |
| 14  | Ast6-2      | 0.301                                          | 20                        | 2.13       | Qualified |
| 15  | Ast6-3      | 0.306                                          | 20                        | 2.14       | Qualified |
| 16  | Ast12-1     | 0.323                                          | 20                        | 2.13       | Qualified |
| 17  | Ast12-2     | 0.324                                          | 20                        | 2.12       | Qualified |
| 18  | Ast12-3     | 0.320                                          | 20                        | 2.14       | Qualified |
| 19  | Ast24-1     | 0.385                                          | 20                        | 2.13       | Qualified |
| 20  | Ast24-2     | 0.374                                          | 20                        | 2.12       | Qualified |
| 21  | Ast24-3     | 0.376                                          | 20                        | 2.12       | Qualified |
| 22  | Tamo t6-1   | 0.301                                          | 20                        | 2.13       | Qualified |
| 23  | Tamo 6-2    | 0.308                                          | 20                        | 2.14       | Qualified |
| 24  | Tamo 6-3    | 0.299                                          | 20                        | 2.11       | Qualified |
| 25  | Tamo12-1    | 0.320                                          | 20                        | 2.14       | Qualified |
| 26  | Tamo 12-2   | 0.319                                          | 20                        | 2.13       | Qualified |
| 27  | Tamo 12-3   | 0.326                                          | 20                        | 2.14       | Qualified |
| 28  | Tamo 24-1   | 0.375                                          | 20                        | 2.10       | Qualified |
| 29  | Tamo 24-2   | 0.384                                          | 20                        | 2.13       | Qualified |
| 30  | Tamo 24-3   | 0.390                                          | 20                        | 2.11       | Qualified |

| No. | Sample Name | Concentration<br>(µg/µL) | Vol.<br>(µL) | A260/ A280 | Result    |
|-----|-------------|--------------------------|--------------|------------|-----------|
| 31  | Chloro 0-1  | 0.282                    | 20           | 2.11       | Qualified |
| 32  | Chloro 0-2  | 0.289                    | 20           | 2.13       | Qualified |
| 33  | Chloro 0-3  | 0.292                    | 20           | 2.12       | Qualified |
| 34  | Chloro 6-1  | 0.314                    | 20           | 2.13       | Qualified |
| 35  | Chloro 6-2  | 0.317                    | 20           | 2.13       | Qualified |
| 36  | Chloro 6-3  | 0.315                    | 20           | 2.13       | Qualified |
| 37  | Chloro 12-1 | 0.345                    | 20           | 2.14       | Qualified |
| 38  | Chloro 12-2 | 0.356                    | 20           | 2.12       | Qualified |
| 39  | Chloro 12-3 | 0.332                    | 20           | 2.14       | Qualified |
| 40  | Chloro 24-1 | 0.413                    | 20           | 2.12       | Qualified |
| 41  | Chloro 24-2 | 0.408                    | 20           | 2.13       | Qualified |
| 42  | Chloro 24-3 | 0.414                    | 20           | 2.14       | Qualified |
| 43  | Trim6-1     | 0.310                    | 20           | 2.12       | Qualified |
| 44  | Trim6-2     | 0.307                    | 20           | 2.13       | Qualified |
| 45  | Trim6-3     | 0.303                    | 20           | 2.15       | Qualified |
| 46  | Trim12-1    | 0.325                    | 20           | 2.13       | Qualified |
| 47  | Trim12-2    | 0.330                    | 20           | 2.12       | Qualified |
| 48  | Trim12-3    | 0.323                    | 20           | 2.11       | Qualified |
| 49  | Trim24-1    | 0.377                    | 20           | 2.13       | Qualified |
| 50  | Trim24-2    | 0.386                    | 20           | 2.12       | Qualified |
| 51  | Trim24-3    | 0.386                    | 20           | 2.13       | Qualified |
| 52  | Diphe t6-1  | 0.299                    | 20           | 2.13       | Qualified |
| 53  | Diphe 6-2   | 0.301                    | 20           | 2.14       | Qualified |
| 54  | Diphe 6-3   | 0.307                    | 20           | 2.13       | Qualified |
| 55  | Diphe12-1   | 0.322                    | 20           | 2.12       | Qualified |
| 56  | Diphe 12-2  | 0.319                    | 20           | 2.11       | Qualified |
| 57  | Diphe 12-3  | 0.327                    | 20           | 2.13       | Qualified |
| 58  | Diphe 24-1  | 0.380                    | 20           | 2.13       | Qualified |
| 59  | Diphe 24-2  | 0.382                    | 20           | 2.13       | Qualified |
| 60  | Diphe 24-3  | 0.372                    | 20           | 2.12       | Qualified |

| No. | Sample Name | Concentration | Vol.<br>(µL) | A260/ A280 | Result    |
|-----|-------------|---------------|--------------|------------|-----------|
| 61  | Dosu6-1     | 0.303         | 20           | 2.13       | Qualified |
| 62  | Dosu6-2     | 0.309         | 20           | 2.12       | Qualified |
| 63  | Dosu6-3     | 0.305         | 20           | 2.13       | Qualified |
| 64  | Dosu12-1    | 0.319         | 20           | 2.12       | Qualified |
| 65  | Dosu12-2    | 0.325         | 20           | 2.12       | Qualified |
| 66  | Dosu12-3    | 0.325         | 20           | 2.14       | Qualified |
| 67  | Dosu24-1    | 0.388         | 20           | 2.12       | Qualified |
| 68  | Dosu24-2    | 0.383         | 20           | 2.11       | Qualified |
| 69  | Dosu24-3    | 0.389         | 20           | 2.12       | Qualified |
| 70  | Terfe6-1    | 0.305         | 20           | 2.14       | Qualified |
| 71  | Terfe6-2    | 0.305         | 20           | 2.12       | Qualified |
| 72  | Terfe6-3    | 0.310         | 20           | 2.13       | Qualified |
| 73  | Terfe12-1   | 0.330         | 20           | 2.13       | Qualified |
| 74  | Terfe12-2   | 0.327         | 20           | 2.13       | Qualified |
| 75  | Terfe12-3   | 0.330         | 20           | 2.14       | Qualified |
| 76  | Terfe24-1   | 0.388         | 20           | 2.15       | Qualified |
| 77  | Terfe24-2   | 0.382         | 20           | 2.13       | Qualified |
| 78  | Terfe24-3   | 0.389         | 20           | 2.14       | Qualified |
| 79  | Hexe6-1     | 0.299         | 20           | 2.14       | Qualified |
| 80  | Hexe6-2     | 0.304         | 20           | 2.11       | Qualified |
| 81  | Hexe6-3     | 0.309         | 20           | 2.11       | Qualified |
| 82  | Hexe12-1    | 0.328         | 20           | 2.11       | Qualified |
| 83  | Hexe12-2    | 0.325         | 20           | 2.12       | Qualified |
| 84  | Hexe12-3    | 0.334         | 20           | 2.12       | Qualified |
| 85  | Hexe24-1    | 0.388         | 20           | 2.11       | Qualified |
| 86  | Hexe24-2    | 0.384         | 20           | 2.14       | Qualified |
| 87  | Hexe24-3    | 0.390         | 20           | 2.12       | Qualified |
| 88  | Quini6-1    | 0.304         | 20           | 2.13       | Qualified |
| 89  | Quini6-2    | 0.309         | 20           | 2.13       | Qualified |
| 90  | Quini6-3    | 0.309         | 20           | 2.12       | Qualified |

| No. | Sample Name | Concentration | Vol.<br>(μL) | A260/ A280 | Result    |
|-----|-------------|---------------|--------------|------------|-----------|
| 91  | Quini12-1   | 0.322         | 20           | 2.11       | Qualified |
| 92  | Quini12-2   | 0.329         | 20           | 2.12       | Qualified |
| 93  | Quini12-3   | 0.322         | 20           | 2.12       | Qualified |
| 94  | Quini24-1   | 0.378         | 20           | 2.11       | Qualified |
| 95  | Quini24-2   | 0.384         | 20           | 2.12       | Qualified |
| 96  | Quini24-3   | 0.382         | 20           | 2.13       | Qualified |
| 97  | D,L-Sul6-1  | 0.302         | 20           | 2.13       | Qualified |
| 98  | D,L-Sul6-2  | 0.304         | 20           | 2.12       | Qualified |
| 99  | D,L-Sul6-3  | 0.298         | 20           | 2.12       | Qualified |
| 100 | D,L-Sul12-1 | 0.322         | 20           | 2.12       | Qualified |
| 101 | D,L-Sul12-2 | 0.320         | 20           | 2.11       | Qualified |
| 102 | D,L-Sul12-3 | 0.318         | 20           | 2.14       | Qualified |
| 103 | D,L-Sul24-1 | 0.376         | 20           | 2.14       | Qualified |
| 104 | D,L-Sul24-2 | 0.368         | 20           | 2.13       | Qualified |
| 105 | D,L-Sul24-3 | 0.382         | 20           | 2.14       | Qualified |

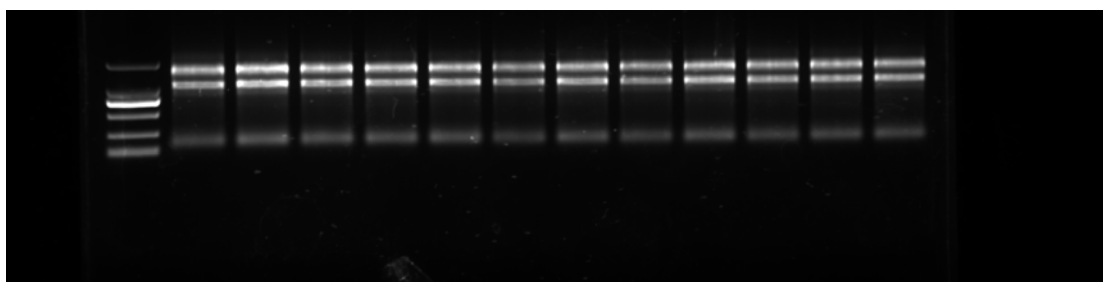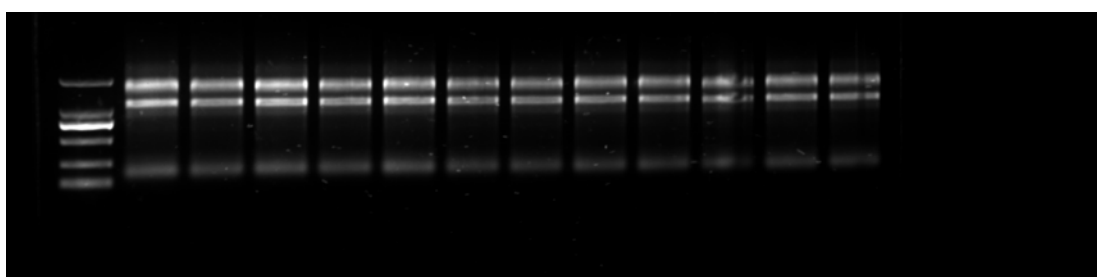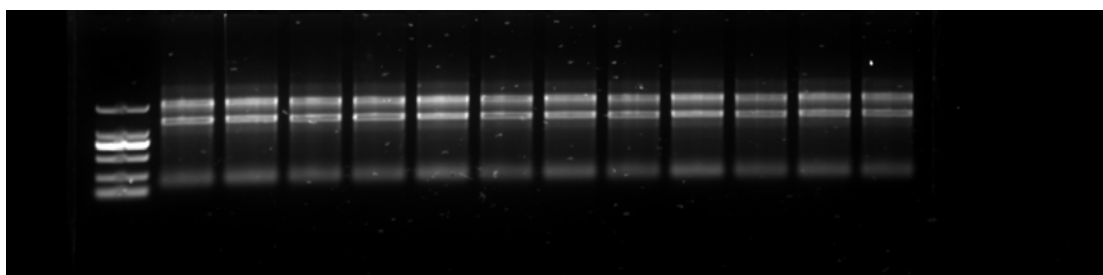

Supplement: s1 [file s1]
